# Supplementary material for: Bone marrow Tregs mediate stromal cell function and support hematopoiesis via IL-10
Source: JCI journal article supplement (doi:10.1172/jci.insight.135681), 2020-11-18
Supplement: sd1 [file 1]

Supplement Figures and Data:

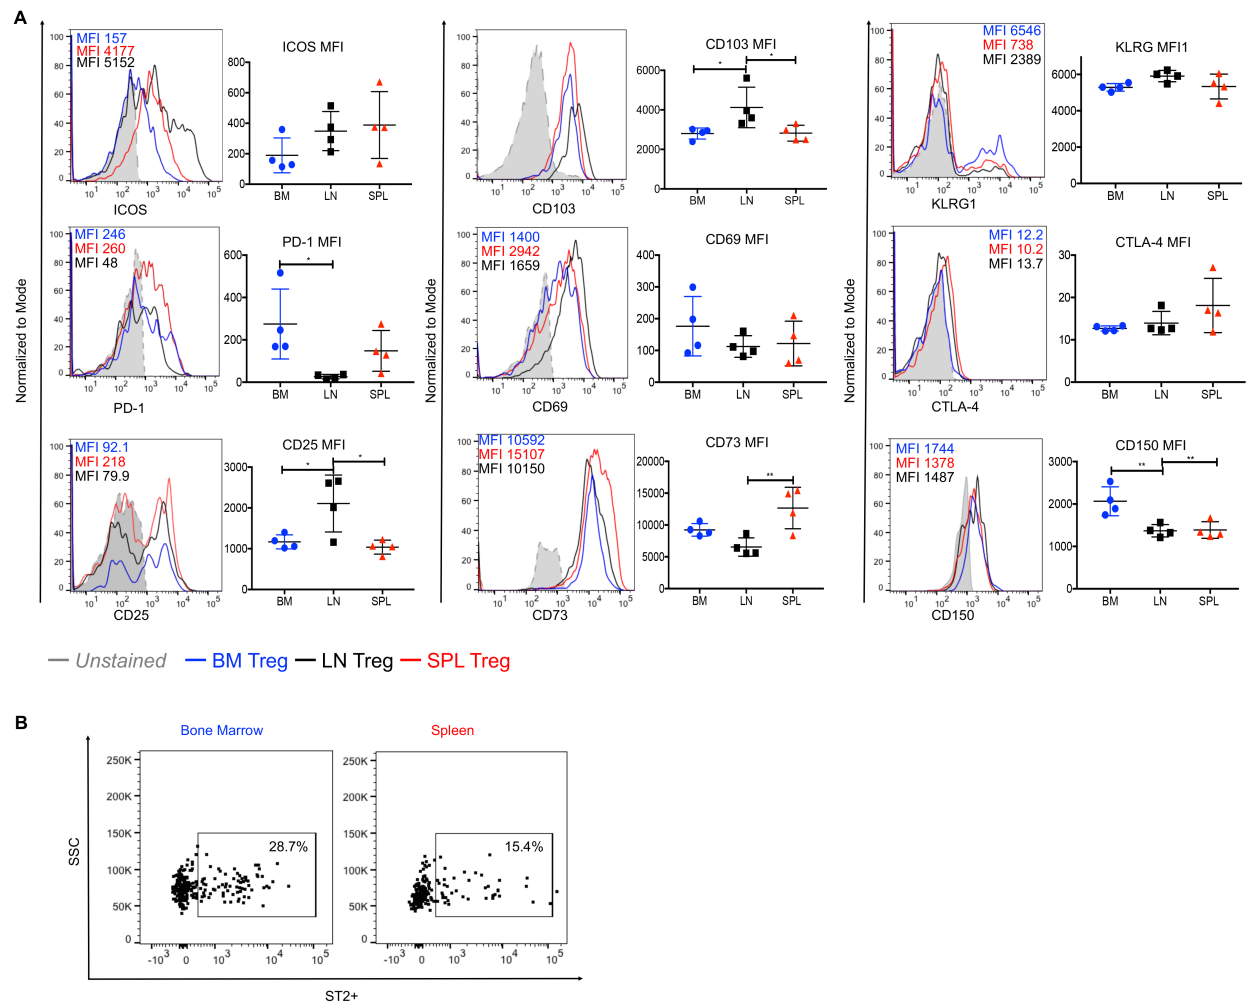

SUPPLEMENTARY FIGURE 1

**Supplementary Figure 1: Cellular profiling of bone marrow Tregs**

S1A. Representative histogram and quantification of MFI of ICOS, CD103, KLRG1, PD-1, CD69, CTLA-4, CD25, CD73 and CD150 in indicated tissues; n=4 animals per group.

S1B. Representative plots of ST2<sup>+</sup> cells in indicated tissues.

Data are shown as mean  $\pm$  SD; graphs shown are representative of at least three independent experiments. Statistical analysis performed with one-way ANOVA with Tukey' multiple comparisons test at 95.00% CI of diff (S1C); \*p < 0.05, \*\*p < 0.01, \*\*\*p < 0.001, \*\*\*\*p < 0.0001.



**Supplementary Figure 2: Marrow Tregs localize to their site of origin.**

S2A. Heatmap of selected top differentially expressed genes in Foxp3<sup>+</sup> cells from spleen and lymph node; n=3 biological replicates per tissue sample. Genes with FC with FC < 2 or > 2, and adjusted p-value < 0.05 are shown (right). GO analysis of enriched pathways in bone marrow Foxp3<sup>+</sup> cells; n=3 biological replicates (left). S2B. Heatmap of top differentially expressed pathways from single-cell transcriptomes of tissue Treg populations: lymph (LN), spleen (SP), peripheral blood (PB), bone marrow (BM), fat (FT), and skin (SK) Tregs (right). Relative abundance of CD150 and CXCR4 expression among tissue Treg populations is shown (bottom).

S2C. Frequencies and representative MFI of Foxp3<sup>+</sup> cells showing frequencies and representative MFI histograms of CD62L, CD49b, and CXCR4 from bone marrow (blue) lymph node (black) spleen (red) and unstained controls.

S2D: Cellular exchange in bone marrow, lymph node, and spleen of parabionts (left). Exchange of B cell, T cell, and Myeloid cell lineages in peripheral blood (right). Host (black) and donor populations (red).

S2E: Total chimerism of CD4<sup>+</sup> (left) and CD8<sup>+</sup> cells (right) in bone marrow lymph node and spleen of parabionts. Host (black) and donor populations (red).

S2F: Frequency of Treg exchange among CD4<sup>+</sup> cells in bone marrow, lymph node, and spleen of parabionts; Foxp3<sup>+</sup>CD4<sup>+</sup> exchanged (red), Foxp3<sup>-</sup>CD4<sup>+</sup> exchanged (red), Foxp3<sup>-</sup>CD4<sup>+</sup> resident (black).

Data are shown as mean ± SD; graphs shown are representative of at least three independent experiments. Statistical analysis performed with one-way ANOVA with Tukey' multiple comparisons test at 95.00% CI of diff (S2C); \*p < 0.05, \*\*p < 0.01, \*\*\*p < 0.001, \*\*\*\*p < 0.0001.



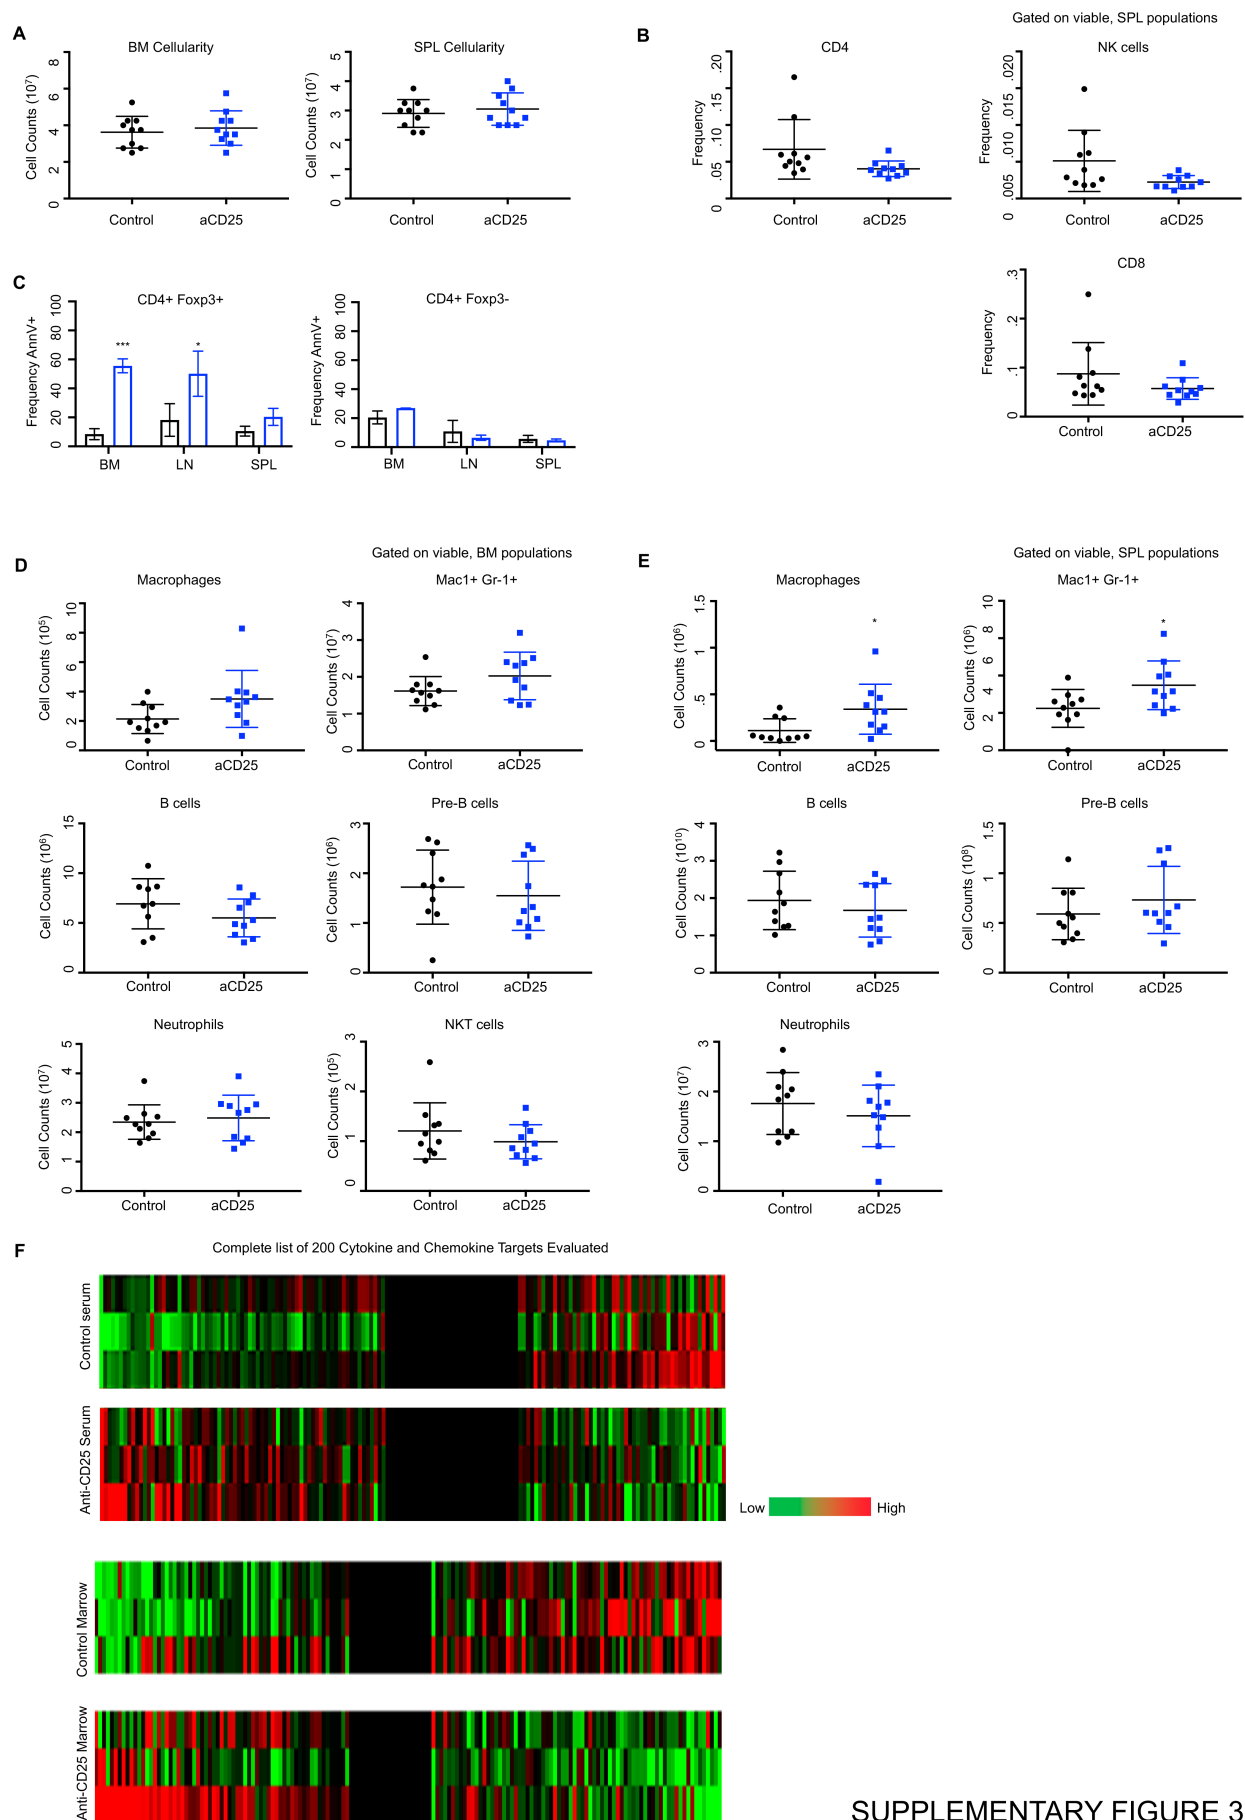

SUPPLEMENTARY FIGURE 3

### **Supplementary Figure 3: Treg depletion does not result in inflammation**

S3A: Absolute counts of bone marrow and spleen cellularity following anti-CD25; control (black), anti-CD25 (blue); n=10 animals per group for each tissue.

S3B: Absolute frequencies of CD4<sup>+</sup>, CD8<sup>+</sup> and NK1.1<sup>+</sup> cells following anti-CD25; control (black), anti-CD25 (blue); n=10 animals per group.

S3C: Frequency of AnnexinV<sup>+</sup> cells in Foxp3<sup>+</sup>CD4<sup>+</sup> and Foxp3<sup>-</sup>CD4<sup>+</sup> cells following anti-CD25; control (black), anti-CD25 (blue) (left); n=4 animals per group.

S3D: Absolute counts of bone marrow populations following anti-CD25: Macrophages, Myeloid cells, B cells, Neutrophils, and NKT cells; control (black), anti-CD25 (blue) n=10 animals per group.

S3E: Absolute counts of splenic populations following anti-CD25: Macrophages, Myeloid cells, B cells, Neutrophils; control (black), anti-CD25 (blue); n=10 animals per group.

F. Complete target list of serum and bone marrow fluid cytokines and chemokines following anti-CD25 depletion (ordered based on fold change).

Data are shown as mean  $\pm$  SD; graphs shown are representative of at least three independent experiments.

Statistical analysis performed with unpaired two-tailed Student *t* test (3A-E). \**p* < 0.05, \*\**p* < 0.01, \*\*\**p* < 0.001, \*\*\*\**p* < 0.0001.

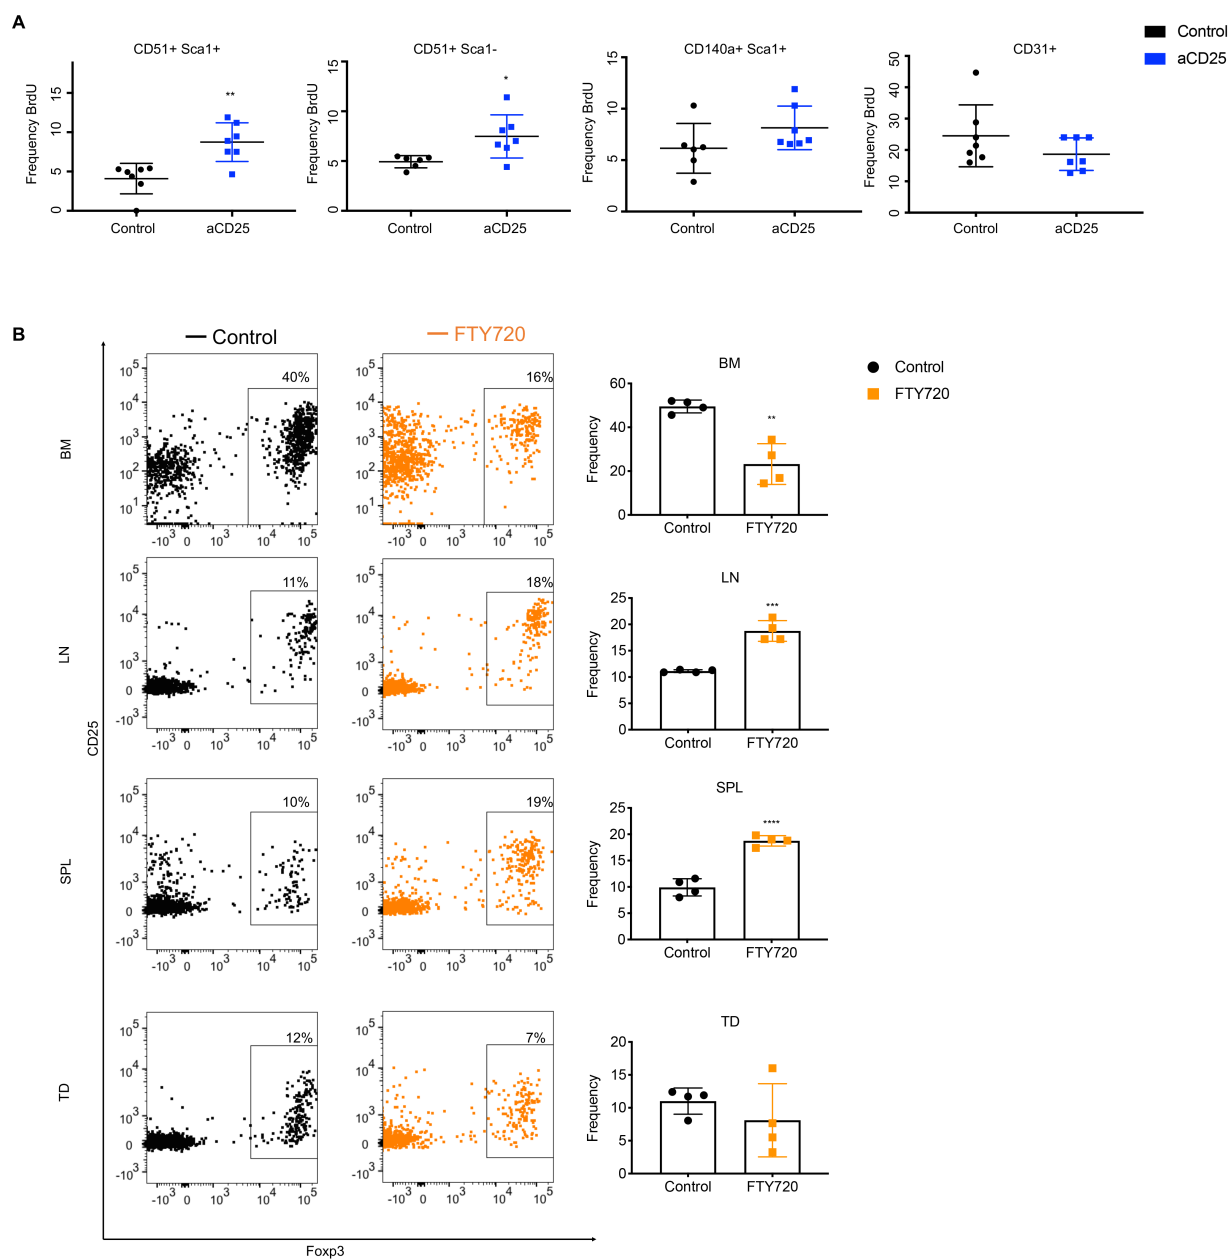

SUPPLEMENTARY FIGURE 4

**Supplementary Figure 4: Tregs are required for stromal cell maintenance**

S4A. Frequency of BrdU<sup>+</sup> cells: CD51<sup>+</sup>Sca1<sup>+</sup> cells (MSCs), CD51<sup>+</sup> Sca1<sup>-</sup> (bone precursors), CD140α<sup>+</sup> Sca1<sup>+</sup> (PDGFRα<sup>+</sup> cells), endothelial cells (CD31<sup>+</sup>) following anti-CD25; control (black), anti-CD25 (blue); n=7 animals per group.

S4B: Representative plot of Foxp3<sup>+</sup> cells in bone marrow, lymph node, spleen and thoracic duct (right); frequencies of Foxp3<sup>+</sup> cells (left); control (black), FTY720 (orange); n=4 animals per group.

Data are shown as mean ± SD; graphs shown are representative of at least three independent experiments.

Statistical analysis performed with unpaired two-tailed Student *t* test (S4A-B)\*p < 0.05, \*\*p < 0.01, \*\*\*p < 0.001, \*\*\*\*p < 0.0001.

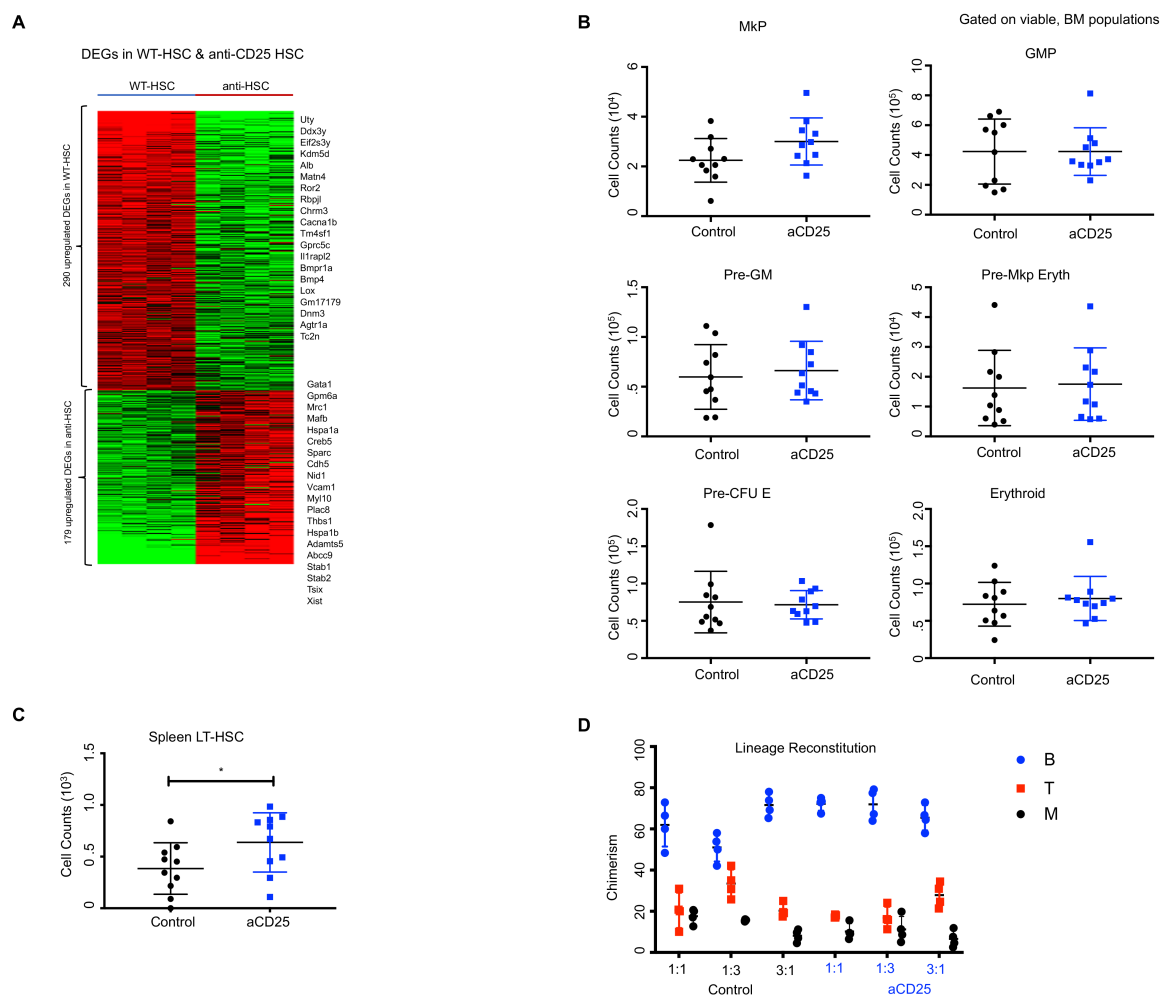

SUPPLEMENTARY FIGURE 5

**Supplementary Figure 5: Bone marrow Tregs enhance HSC-supportive activity of stromal cells**

S5A. Heatmap of top differentially expressed genes in LT-HSC's from control and anti-CD25 mice; n=4 biological replicates per treatment condition. Genes with FC < 1/2 or >2, and adjusted p-value <0.05 are shown.

S5B. Absolute counts of bone marrow populations following anti-CD25: MkP, GMP, pre-GM, Pre Mkp Eryth, Pre-CFU-E, Erythroid; control (black), anti-CD25 (blue); n=10 animals per group.

S5C. Absolute counts of splenic LT-HSC populations following anti-CD25; control (black), anti-CD25 (blue); n=10 animals per group.

S5D. Multi-lineage engraftment of B cell (blue); T cell (red) and Myeloid cell (black) lineages; control (black), anti-CD25 (blue); n=4 recipients per group.

Data are shown as mean  $\pm$  SD; graphs shown are representative of at least three independent experiments.

Statistical analysis performed with unpaired two-tailed Student *t* test (4A-C) \*p < 0.05, \*\*p < 0.01, \*\*\*p < 0.001, \*\*\*\*p < 0.0001.

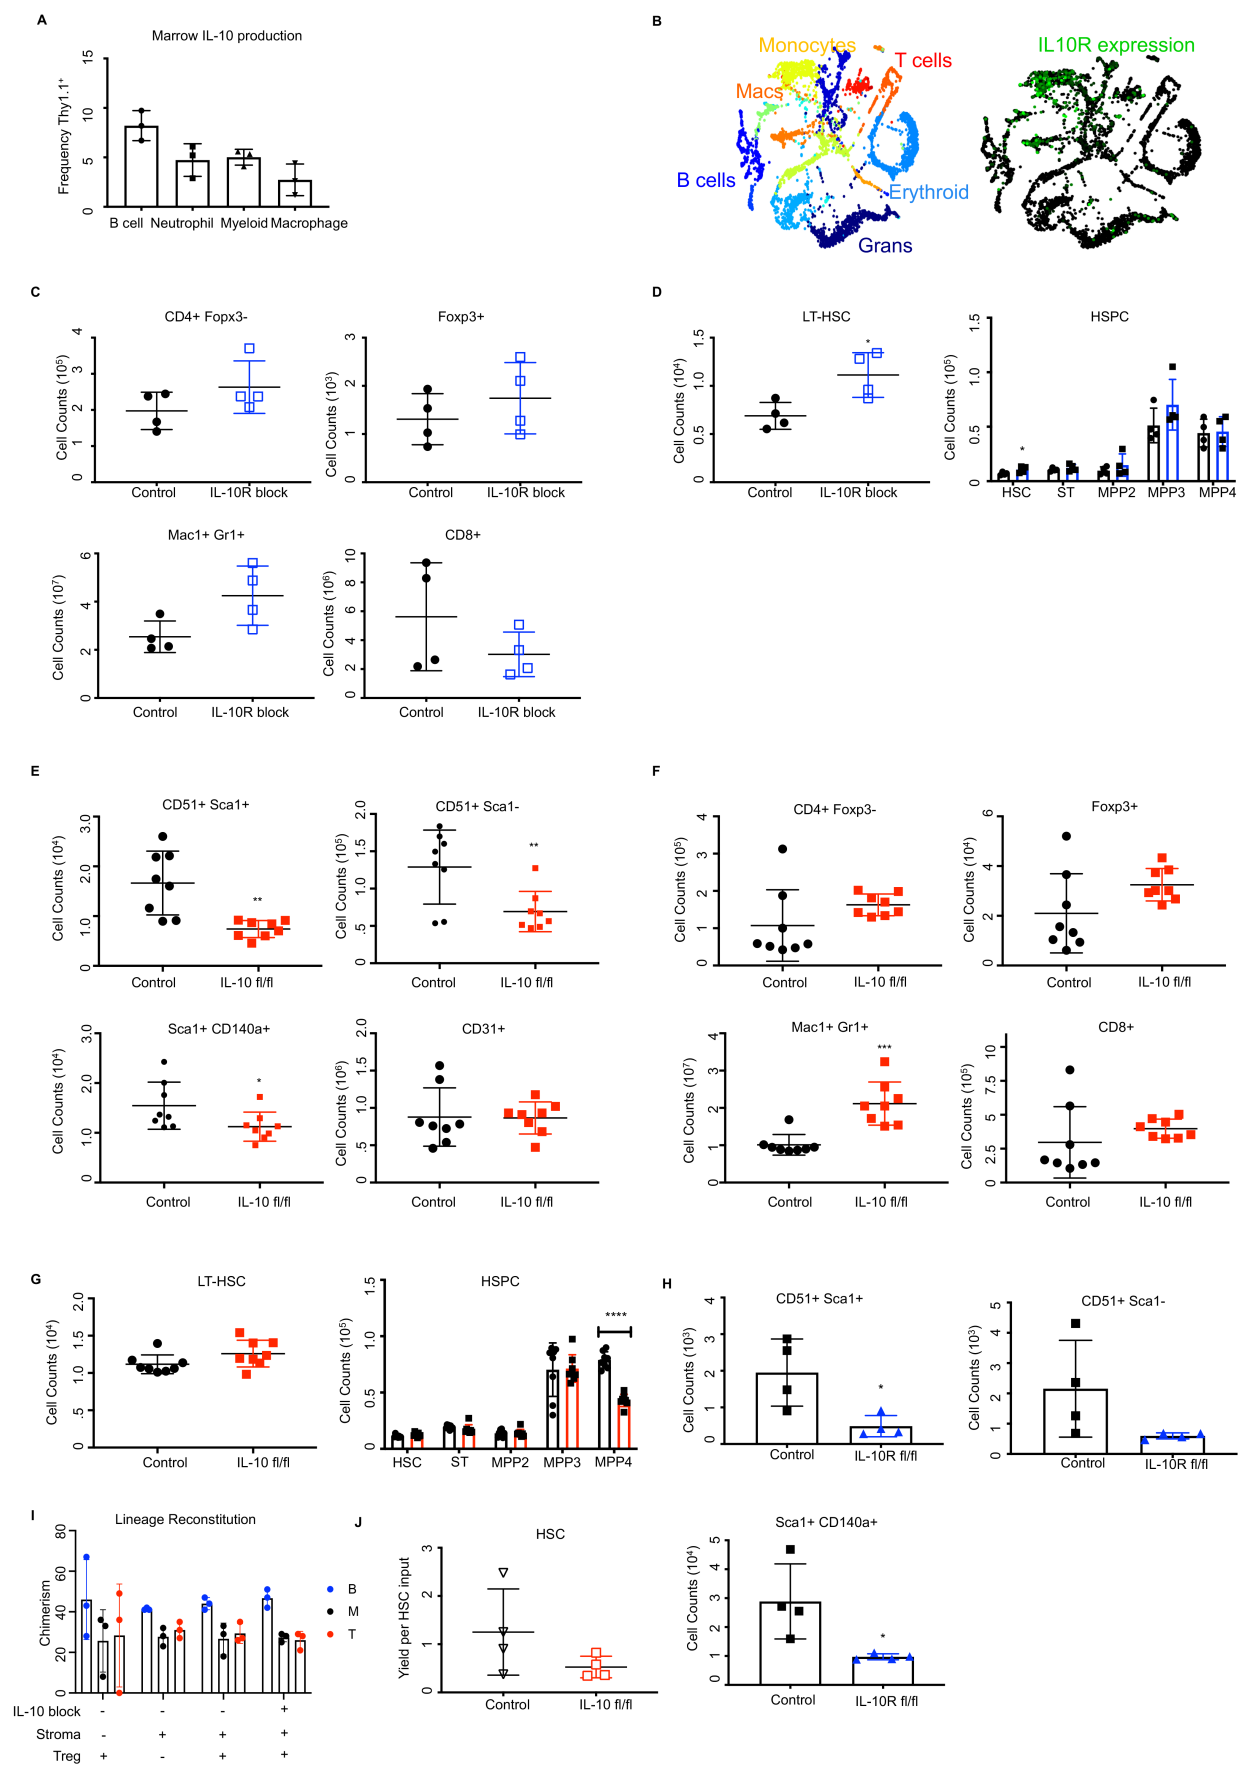

SUPPLEMENTARY FIGURE 6

### **Supplementary Figure 6: Treg IL-10 restricts stromal cell proliferation and differentiation**

S6A: Quantification of IL-10-expressing (Thy1.1<sup>+</sup>) cells in B cell, Neutrophil, Myeloid cells, Macrophages; n=3 animals per group.

S6B: SPRING plots of mature bone marrow populations: B cell, Neutrophil, Myeloid cells, Macrophages (right). Relative abundance of IL-10Ra expression within bone marrow populations is shown in green (left).

S6C. Absolute counts of Foxp3<sup>-</sup> CD4<sup>+</sup>, Foxp3<sup>+</sup>CD4<sup>+</sup>, CD8<sup>+</sup>, and Mac1<sup>+</sup>Gr1<sup>+</sup> cells in IL-10R<sup>BLOCK</sup> mice; control (black), IL-10R<sup>BLOCK</sup> (blue); n=4 animals per group.

S6D. Absolute counts of HSPCs in IL-10R<sup>BLOCK</sup> mice; control (black), IL-10R<sup>BLOCK</sup> (blue); n=4 animals per group.

S6E. Absolute counts of CD51<sup>+</sup> Sca1<sup>+</sup> cells (MSCs), CD51<sup>+</sup>Sca1<sup>-</sup> (bone precursors), and CD140α<sup>+</sup>Sca-1<sup>+</sup> (PDGFRα<sup>+</sup> cells), endothelial cells (CD45<sup>-</sup>/Ter119<sup>-</sup>CD31<sup>+</sup>) in Foxp3-Cre×IL-10<sup>fl/fl</sup> mice; control (black), 10<sup>fl/fl</sup> (red); n=8 animals per group.

S6F. Absolute counts of Foxp3<sup>-</sup> CD4<sup>+</sup>, Foxp3<sup>+</sup>CD4<sup>+</sup>, CD8<sup>+</sup>, and Mac1<sup>+</sup>Gr1<sup>+</sup> cells in Foxp3-Cre×IL-10<sup>fl/fl</sup> mice; control (black), 10<sup>fl/fl</sup> (red); n=8 animals per group.

S6G. Absolute counts of HSPCs in Foxp3-Cre×IL-10<sup>fl/fl</sup> mice; control (black), 10<sup>fl/fl</sup> (red); n=8 animals per group.

S6H. Absolute counts of CD51<sup>+</sup>Sca1<sup>+</sup> cells (MSCs), and CD31<sup>-</sup>CD51<sup>+</sup> Sca1<sup>-</sup> bone precursors, and CD140α<sup>+</sup>Sca-1<sup>+</sup> (PDGFRα<sup>+</sup>), in Prrx1-Cre×IL10Rα<sup>fl/fl</sup> mice; control (black), 10Rα<sup>fl/fl</sup> (blue) n=4 animals per group.

S6I. Multi-lineage engraftment of ex-vivo cultured HSC: B cell (blue); T cell (red) and Myeloid cell (black); n=3 recipients per group.

S6J. Co-culture of LT-HSCs maintained on WT stroma (black) or Foxp3-Cre×IL-10<sup>fl/fl</sup> stroma (red) for 96 hours; Data expressed as fold-change relative to input of HSCs; n=4 wells per condition.

Data are shown as mean ± SD; graphs shown are representative of at least three independent experiments.

Statistical analysis performed with unpaired two-tailed Student *t* test (6C-G). \*p < 0.05, \*\*p < 0.01, \*\*\*p < 0.001, \*\*\*\*p < 0.0001



**Supplemental Table 1: Complete Antibody Information.**

| <b>Antibody</b>    | <b><u>Clones</u></b>  | <b>Catalog Number</b> | <b>Source</b>                |
|--------------------|-----------------------|-----------------------|------------------------------|
| KLRG1              | <u>14C2A07</u>        | 138411                | Biolegend                    |
| ICOS               | <u>15F9</u>           | 117405                | Biolegend                    |
| CD25               | <u>PC67</u>           | 102049                | Biolegend                    |
| CD103              | <u>2E7</u>            | 121423                | Biolegend                    |
| CD44               | <u>IM7</u>            | 103028                | Biolegend                    |
| CD62L              | <u>MEL-14</u>         | 104410                | Biolegend                    |
| CD49b              | <u>DX5</u>            | 108909                | Biolegend                    |
| CD127              | <u>A7R34</u>          | 135010                | Biolegend                    |
| CTLA-4             | <u>UC10-4B9</u>       | 17-1522-82            | eBioscience                  |
| PD-1               | <u>RMP1-14</u>        | 114117                | Biolegend                    |
| CD73               | <u>AD2, TY/11.8</u>   | 563198, 127210        | Fisher Scientific, Biolegend |
| CD69               | <u>FN50</u>           | 310911                | Biolegend                    |
| CXCR4              | <u>12G5</u>           | 306509                | Biolegend                    |
| CD150              | <u>TC15</u>           | 115941                | Biolegend                    |
| S1PR1              | <u>SW4GYPP</u>        | 50-3639-41            | ThermoFisher Scientific      |
| ST2                | <u>U29-93</u>         | U29-93                | BD Biosciences               |
| CD3                | <u>145-2C11, 17A2</u> | 100351, 100222        | Biolegend                    |
| CD4                | <u>GK1.5</u>          | 100426                | Biolegend                    |
| CD8                | <u>53-6.7</u>         | 100714                | Biolegend                    |
| NK-1.1             | <u>PK136</u>          | 108719                | Biolegend                    |
| Ly-6G/Ly-6C (Gr-1) | <u>RB6</u>            | 108410                | Biolegend                    |
| CD115              | <u>AFS98</u>          | 135510                | Biolegend                    |
| CD11b              | <u>M1/70</u>          | 101204                | Biolegend                    |
| F4/80              | <u>BM8</u>            | 123118                | Biolegend                    |
| CD45R/B220         | <u>RA3-6B2</u>        | 103206                | Biolegend                    |
| CD19               | <u>6D5</u>            | 115510                | Biolegend                    |
| CD43               | <u>S11</u>            | 143204                | Biolegend                    |
| Ter119             | <u>Ly-76</u>          | 116233                | Biolegend                    |
| Flk-2, Flt3        | <u>A2F10</u>          | 135315                | Biolegend                    |
| CD34               | <u>RAM34</u>          | 11-0341-82            | Biolegend                    |
| CD48               | <u>HM48-1</u>         | 103439                | Biolegend                    |
| CD45               | <u>30-F11</u>         | 103110                | Biolegend                    |
| Ly-6A/E (Sca-1)    | <u>D7</u>             | 108134                | Biolegend                    |
| CD31               | <u>390</u>            | 102422                | Biolegend                    |
| c-kit (CD117)      | <u>2B8</u>            | 105826                | Biolegend                    |
| CD140a             | <u>APA5</u>           | 25-1401-80            | eBioscience                  |
| CD51               | <u>RMV-7</u>          | 104106                | Biolegend                    |
| CD45.2             | <u>104</u>            | 109806                | Biolegend                    |
| CD45.1             | <u>A20</u>            | 110741                | Biolegend                    |
| CD41               | <u>MWReg30</u>        | 133904                | Biolegend                    |
